# Supplementary material for: Gut Microbial Gene Expression in Mother-Fed and Formula-Fed Piglets
Source: PubMed Central journal article supplement (PMC2929194; doi:10.1371/journal.pone.0012459), 2010-08-27

# Observations (axes D1 and D2: 55.25 %)

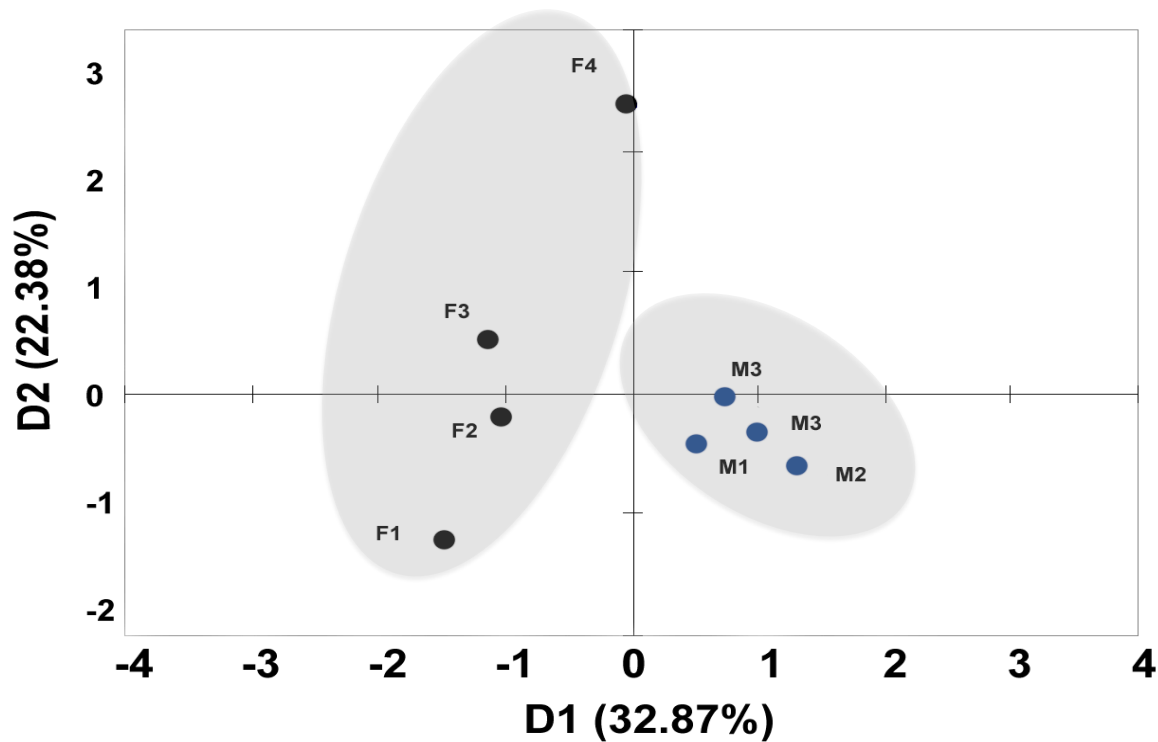

Supplement: pone.0012459.s001.pdf [file pone.0012459.s001.pdf]
