# Supplementary material for: Gut Microbial Gene Expression in Mother-Fed and Formula-Fed Piglets
Source: PLoS One. 2010 Aug 27;5(8):e12459. doi: 10.1371/journal.pone.0012459 (PMC2929194; doi:10.1371/journal.pone.0012459)
Supplement: Table S1 — Gut microbial community structure in MF and FF piglets. Relative abundance of organisms was determined by amplification and sequencing of 16S rDNA present within microbial DNA isolated from the cecal contents of each animal. Relative abundance of sequences represents the number of sequences assigned to a given taxa for an individual animal divided by the total number of sequences for that animal. Mean relative abundance represents the average of these values in either the MF or FF groups. (0.03 MB XLS) [file pone.0012459.s002.xls]

## Sheet: Table S1
	Mother fed (MF)		Formula fed (FF)		p value
	Mean relative abundance	Standard error	Mean relative abundance	Standard error
Phylum
Lentisphaerae	0.00573497	0.00310759	0	0	0.0622857
Spirochaetes	0.00184387	0.00108551	0	0	0.0795714
Fibrobacteres	0.000948859	0.00055476	0	0	0.250007
Bacteroidetes	0.498427	0.0341298	0.635115	0.104103	0.259429
Actinobacteria	0.000263992	0.000263992	0.00130662	0.00130662	0.368309
Firmicutes	0.418647	0.0534276	0.317278	0.101008	0.387143
Proteobacteria	0.0642102	0.0398431	0.0321996	0.00907198	0.435429
Fusobacteria	0.00820448	0.00568882	0.0141005	0.00698362	0.476143
TM7	0.000771507	0.000449107	0	0	0.500005
Planctomycetes	0.000527983	0.000527983	0	0	0.500005
Verrucomicrobia	0.000420875	0.000420875	0	0	1
Genus
Bacteroides	0.00754634	0.00490577	0.407014	0.0413878	0
Prevotella	0.311579	0.0449423	0.0170865	0.016623	0.000727273
Oscillibacter	0.150116	0.0353933	0.014059	0.00815197	0.00390909
Parabacteroides	0.0139315	0.00300003	0.0847574	0.0190085	0.00536364
Anaerovibrio	0.0167947	0.00565744	0	0	0.0105758
Clostridium	0.0180586	0.00668409	0	0	0.014
Alistipes	0	0	0.0291907	0.0108143	0.0147273
Turicibacter	0.0141879	0.0048302	0.00176887	0.00176887	0.0231515
Sporacetigenium	0.0453732	0.0160029	0.00618683	0.00306334	0.0238788
Acidaminococcus	0	0	0.0169744	0.00859144	0.0546061
Roseburia	0.00692549	0.00192561	0.0168135	0.00482752	0.0602727
Xylanibacter	0.0243754	0.00475971	0.010811	0.00566774	0.0756667
Victivallis	0.0120082	0.00686351	0	0	0.0846667
Eubacterium	0.00182927	0.00182927	0.0114161	0.00574043	0.114394
Dorea	0.00722483	0.00182869	0.0423455	0.0227135	0.12303
Lactobacillus	0.0948254	0.0487846	0.0202413	0.00423447	0.129818
Blautia	0.00485588	0.0034284	0.0506395	0.0301739	0.134818
Faecalibacterium	0.0122716	0.00525198	0.00380563	0.00238124	0.150879
Parasutterella	0	0	0.0219111	0.0152383	0.159273
Wolinella	0.0149134	0.0126063	0	0	0.267394
Anaerovorax	0.00816396	0.00663827	0.00104603	0.00104603	0.331061
Helicobacter	0.0553571	0.0553571	0	0	0.376455
Butyricimonas	0.021484	0.0127367	0.00887666	0.00308556	0.434091
Butyricicoccus	0.00412301	0.00223013	0.0146481	0.0108704	0.443455
Megasphaera	0.00927822	0.00469036	0.0173765	0.0102666	0.576636
Rikenella	0.00451299	0.00271662	0.0109204	0.00957657	0.627515
Subdoligranulum	0.00514069	0.00438312	0.0135983	0.0135983	0.678727
Weeksella	0.102589	0.0471954	0.150769	0.083675	0.713182
Sutterella	0.0107031	0.00339178	0.00732218	0.00732218	0.760424
Fusobacterium	0.00790566	0.00573223	0.00651563	0.00258255	0.862152
Anaerotruncus	0.00808089	0.003087	0.0079973	0.00543393	0.961697
Cetobacterium	0.00584461	0.00391219	0.00590901	0.00523493	0.966061
