# Supplementary material for: Gut Microbial Gene Expression in Mother-Fed and Formula-Fed Piglets
Source: PLoS One. 2010 Aug 27;5(8):e12459. doi: 10.1371/journal.pone.0012459 (PMC2929194; doi:10.1371/journal.pone.0012459)
Supplement: Table S4 — Differentially abundant COG hits in MF and FF piglets. Relative abundance is defined as the number of hits to an individual COG divided by the total number of hits to individual COGs for each individual subject. COGs were excluded if the mean relative abundance in both MF and FF groups was less than 0.0005. A treatment group was considered to be enriched in transcripts from an individual COG if the p value was less than 0.02. (0.03 MB XLS) [file pone.0012459.s005.xls]

## Sheet: Table S4
COG	Annotation	Mother fed		Formula fed		p value
		Mean relative abundance	Standard error	Mean relative abundance	Standard error
COG1014	Pyruvate:ferredoxin oxidoreductase and related 2-oxoacid:ferredoxin oxidoreductases, gamma subunit	0.00311806	0.000287065	0.00573696	0.000271058	0.000973378
COG2235	Arginine deiminase	0.000720203	2.74167e-05	0.000104954	0.000104954	0.00143095
COG0105	Nucleoside diphosphate kinase	0.000907377	0.000118907	0.000117142	8.33789e-05	0.00194676
COG0745	Response regulators consisting of a CheY-like receiver domain and a winged-helix DNA-binding domain	0.006336	0.000278505	0.00321024	0.000507204	0.00207987
COG1501	Alpha-glucosidases, family 31 of glycosyl hydrolases	0.000370057	0.000110153	0.00178657	0.000265679	0.00283694
COG4992	Ornithine/acetylornithine aminotransferase	0.00567478	0.00089473	0.000941192	0.000373726	0.00292845
COG1044	UDP-3-O-[3-hydroxymyristoyl] glucosamine N-acyltransferase	0.000536557	0.000102004	2.87092e-05	2.87092e-05	0.0031198
COG0621	2-methylthioadenine synthetase	0.000500064	0.000192899	0.00159784	0.000163502	0.00481697
COG0096	Ribosomal protein S8	0.00110032	0.000135737	0.00182516	0.000104523	0.00549917
COG0021	Transketolase	0.00149477	0.00028348	0.00020327	0.000119322	0.00563228
COG2077	Peroxiredoxin	0.000257199	0.000166761	0.00121395	0.000165157	0.00626456
COG1488	Nicotinic acid phosphoribosyltransferase	0.000720203	2.74167e-05	0.000214558	0.000124488	0.0069218
COG3291	FOG: PKD repeat	0.00181771	0.000410925	0.000162372	0.000101463	0.00737105
COG0479	Succinate dehydrogenase/fumarate reductase, Fe-S protein subunit	0.000811668	0.000164839	8.61277e-05	8.61277e-05	0.00741265
COG2820	Uridine phosphorylase	0.000701575	0.000104085	0.000157139	9.70768e-05	0.00781198
COG0471	Di- and tricarboxylate transporters	0.00102881	0.000172092	0.000321817	7.03575e-05	0.00799501
COG0304	3-oxoacyl-(acyl-carrier-protein) synthase	0.00114595	0.000197423	0.000231979	0.000141291	0.00830283
COG0150	Phosphoribosylaminoimidazole (AIR) synthetase	0.000552943	0.000148724	0	0	0.0087188
COG3643	Glutamate formiminotransferase	0.000847399	0.000121461	0.000214558	0.000124488	0.00948419
COG1529	Aerobic-type carbon monoxide dehydrogenase, large subunit CoxL/CutL homologs	0.000655227	0.000282248	0.00190141	0.000209057	0.0102163
COG0236	Acyl carrier protein	0.00121112	0.000284005	0.000157139	9.70768e-05	0.0104409
COG2017	Galactose mutarotase and related enzymes	0.00184772	0.000195131	0.00102146	0.00014085	0.0112146
COG2812	DNA polymerase III, gamma/tau subunits	0.000902326	0.000174506	0.000143546	0.000143546	0.0120549
COG0059	Ketol-acid reductoisomerase	0.00065446	7.17188e-05	0.00115513	0.000131063	0.0122213
COG1704	Uncharacterized conserved protein	0.00152254	0.000429669	8.61277e-05	8.61277e-05	0.0132612
COG0188	Type IIA topoisomerase (DNA gyrase/topo II, topoisomerase IV), A subunit	0.00382973	0.00031805	0.0018565	0.000511239	0.0132945
COG1879	ABC-type sugar transport system, periplasmic component	0.00639003	0.00104201	0.00240974	0.000677039	0.0146339
COG0326	Molecular chaperone, HSP90 family	0.000648127	0.000231512	0.00271878	0.000638983	0.0171797
COG0593	ATPase involved in DNA replication initiation	0.000778131	0.000190734	0.000145851	8.79326e-05	0.0176789
COG0711	F0F1-type ATP synthase, subunit b	0.00054513	4.18465e-05	0.000222096	9.88484e-05	0.0176872
COG0363	6-phosphogluconolactonase/Glucosamine-6-phosphate isomerase/deaminase	0.00348234	0.000315192	0.00234412	0.00021693	0.0184193
COG1342	Predicted DNA-binding proteins	0.00198249	0.00055478	0.000321817	7.03575e-05	0.0186106
COG0215	Cysteinyl-tRNA synthetase	0.00132527	0.000313243	0.000271976	0.000167823	0.0187271
COG2141	Coenzyme F420-dependent N5,N10-methylene tetrahydromethanopterin reductase and related flavin-dependent oxidoreductases	0.00161757	0.000545805	0	0	0.0187354
COG5009	Membrane carboxypeptidase/penicillin-binding protein	0.000580904	0.000197776	0	0	0.0193344
